# Supplementary material
Source: PubMed Central journal article supplement (PMC6154449)
Supplement: Supp_Fig1.pdf [file Supp_Fig1.pdf]

## Supplementary Data

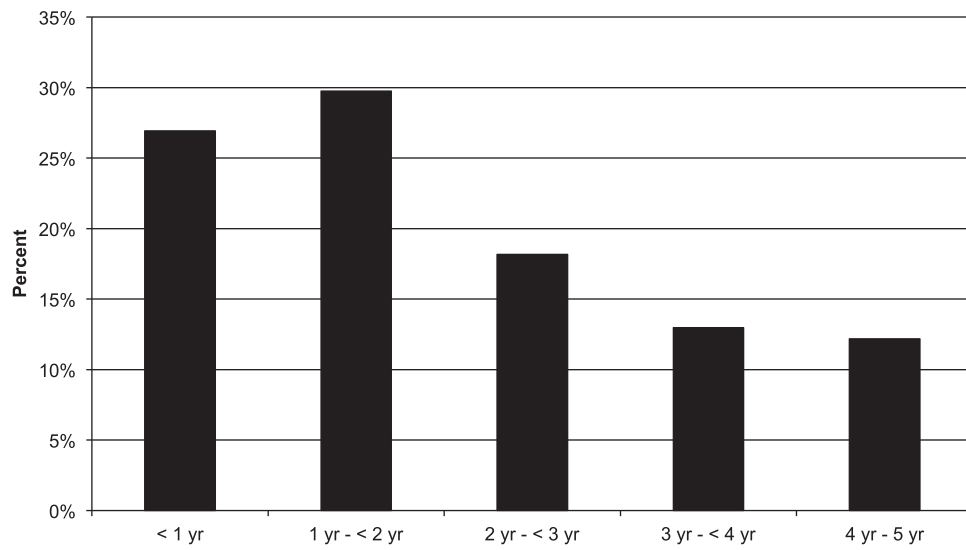

**SUPPLEMENTARY FIG. S1.** Percent of patients with neck reoperation in each of the first five years from initial thyroidectomy.
