# Supplementary material
Source: PubMed Central journal article supplement (PMC6154449)
Supplement: Supp_Table1.pdf [file Supp_Table1.pdf]

SUPPLEMENTARY TABLE S1. TOTAL OR NEAR-TOTAL  
THYROIDECTOMY CODES

| <i>Code</i> | <i>Description</i>                                                           |
|-------------|------------------------------------------------------------------------------|
| ICD-9-CM    |                                                                              |
| 6.4         | Complete thyroidectomy                                                       |
| 6.52        | Complete substernal thyroidectomy                                            |
| CPT         |                                                                              |
| 60240       | Thyroidectomy, total/complete                                                |
| 60252       | Thyroidectomy, total or subtotal for malignancy with limited dissection      |
| 60254       | Thyroidectomy, total or subtotal for malignancy with radical neck dissection |
| 60270       | Thyroidectomy, including substernal thyroid                                  |
| 60271       | Thyroidectomy, including substernal thyroid cervical approach                |
