# Supplementary material
Source: PubMed Central journal article supplement (PMC6154449)
Supplement: Supp_Table2.pdf [file Supp_Table2.pdf]

SUPPLEMENTARY TABLE S2. NECK REOPERATION CODES

| <i>Code</i>        | <i>Description</i>                                                                            |
|--------------------|-----------------------------------------------------------------------------------------------|
| ICD-9-CM           |                                                                                               |
| 40.3               | Regional lymph node excision                                                                  |
| 40.40              | Radical neck dissection, not otherwise specified                                              |
| 40.41              | Radical neck dissection, unilateral                                                           |
| 40.42              | Radical neck dissection, bilateral                                                            |
| 40.21              | Excision of deep cervical lymph node                                                          |
| CPT                |                                                                                               |
| 38720              | Cervical lymphadenectomy (complete)                                                           |
| 38724              | Cervical lymphadenectomy (modified radical neck dissection)                                   |
| 21557              | Radical resection of tumor, soft tissue of neck or anterior thorax; <5 cm                     |
| 38700              | Suprahyoid lymphadenectomy                                                                    |
| 38746              | Thoracic lymphadenectomy                                                                      |
| 38520              | Biopsy or excision of lymph nodes; open, deep cervical nodes with excision of scalene fat pad |
| 38542              | Biopsy or excision of lymph nodes; dissection, deep jugular nodes                             |
| 38500 <sup>a</sup> | Biopsy or excision of lymph nodes; open, superficial                                          |
| 38510 <sup>a</sup> | Biopsy or excision of lymph nodes; open, deep cervical nodes                                  |

<sup>a</sup>Without second primary tumor after thyroid cancer.
