# Supplementary material
Source: PubMed Central journal article supplement (PMC6154449)
Supplement: Supp_Table3.pdf [file Supp_Table3.pdf]

SUPPLEMENTARY TABLE S3. MULTIVARIABLE COX PROPORTIONAL HAZARD MODELS FOR ALL-CAUSE MORTALITY AMONG CALIFORNIA DIFFERENTIATED THYROID CANCERS WITH TOTAL OR NEAR-TOTAL THYROIDECTOMY, 1991–2008

| Variables                               | Males |             |        | Females |             |        |
|-----------------------------------------|-------|-------------|--------|---------|-------------|--------|
|                                         | HR    | CI          | p      | HR      | CI          | p      |
| Neck reoperation                        |       |             |        |         |             |        |
| No                                      | REF   | —           | —      | REF     | —           | —      |
| Yes                                     | 1.80  | [1.45–2.23] | <0.001 | 2.35    | [1.94–2.85] | <0.001 |
| Initial treatment                       |       |             |        |         |             |        |
| No radioiodine                          | REF   | —           | —      | REF     | —           | —      |
| Radioiodine                             | 0.75  | [0.66–0.85] | <0.001 | 0.79    | [0.72–0.88] | <0.001 |
| Race/ethnicity                          |       |             |        |         |             |        |
| NH white                                | REF   | —           | —      | REF     | —           | —      |
| NH African American                     | 0.86  | [0.59–1.25] | 0.44   | 1.38    | [1.10–1.72] | 0.005  |
| Hispanic                                | 0.96  | [0.81–1.13] | 0.61   | 0.97    | [0.85–1.10] | 0.62   |
| NH Asian/Pacific Islander               | 0.84  | [0.69–1.02] | 0.09   | 0.79    | [0.68–0.91] | 0.001  |
| Other/unknown                           | 1.56  | [0.50–4.88] | 0.45   | 0.88    | [0.49–1.56] | 0.66   |
| Age at diagnosis (years)                |       |             |        |         |             |        |
| 15–34                                   | 0.04  | [0.03–0.05] | <0.001 | 0.02    | [0.01–0.02] | <0.001 |
| 35–44                                   | 0.06  | [0.05–0.09] | <0.001 | 0.05    | [0.04–0.07] | <0.001 |
| 45–54                                   | 0.15  | [0.12–0.19] | <0.001 | 0.11    | [0.09–0.13] | <0.001 |
| 55–64                                   | 0.27  | [0.22–0.34] | <0.001 | 0.27    | [0.23–0.32] | <0.001 |
| 65–74                                   | 0.50  | [0.42–0.61] | <0.001 | 0.46    | [0.40–0.53] | <0.001 |
| ≥75                                     | REF   | —           | —      | REF     | —           | —      |
| Year of diagnosis                       |       |             |        |         |             |        |
| 1991–1993                               | 1.42  | [1.03–1.96] | 0.03   | 1.86    | [1.40–2.46] | <0.001 |
| 1994–1996                               | 1.33  | [1.03–1.72] | 0.03   | 1.67    | [1.34–2.07] | <0.001 |
| 1997–1999                               | 1.37  | [1.08–1.75] | 0.01   | 1.82    | [1.49–2.22] | <0.001 |
| 2000–2002                               | 1.09  | [0.85–1.39] | 0.49   | 1.37    | [1.12–1.68] | 0.002  |
| 2003–2005                               | 1.00  | [0.78–1.27] | 0.97   | 1.15    | [0.93–1.41] | 0.19   |
| 2006–2008                               | REF   | —           | —      | REF     | —           | —      |
| Histology                               |       |             |        |         |             |        |
| Papillary                               | 0.76  | [0.63–0.90] | 0.002  | 0.78    | [0.68–0.90] | <0.001 |
| Follicular                              | REF   | —           | —      | REF     | —           | —      |
| N stage                                 |       |             |        |         |             |        |
| Stage N0                                | REF   | —           | —      | REF     | —           | —      |
| Stage N1                                | 1.19  | [1.02–1.39] | 0.03   | 1.28    | [1.11–1.46] | <0.001 |
| Unknown                                 | 1.25  | [1.00–1.54] | 0.05   | 1.23    | [1.04–1.44] | 0.01   |
| M stage                                 |       |             |        |         |             |        |
| Stage M0                                | REF   | —           | —      | REF     | —           | —      |
| Stage M1                                | 2.97  | [2.34–3.76] | <0.001 | 2.44    | [1.96–3.04] | <0.001 |
| Unknown                                 | 0.87  | [0.67–1.13] | 0.31   | 0.93    | [0.76–1.13] | 0.46   |
| Tumor size                              |       |             |        |         |             |        |
| <1 cm                                   | REF   | —           | —      | REF     | —           | —      |
| 1–2 cm                                  | 1.02  | [0.82–1.28] | 0.84   | 0.96    | [0.82–1.12] | 0.59   |
| 2–3 cm                                  | 1.13  | [0.90–1.41] | 0.29   | 1.06    | [0.89–1.25] | 0.53   |
| 3–4 cm                                  | 1.33  | [1.05–1.69] | 0.02   | 1.34    | [1.11–1.62] | 0.003  |
| >4 cm                                   | 1.56  | [1.26–1.93] | <0.001 | 1.78    | [1.49–2.12] | <0.001 |
| Unknown                                 | 1.57  | [1.23–2.00] | <0.001 | 1.39    | [1.16–1.68] | <0.001 |
| Extrathyroidal extension                |       |             |        |         |             |        |
| No                                      | REF   | —           | —      | REF     | —           | —      |
| Yes                                     | 1.69  | [1.46–1.96] | <0.001 | 1.88    | [1.68–2.11] | <0.001 |
| Unknown                                 | 1.44  | [1.12–1.84] | 0.004  | 1.26    | [1.02–1.55] | 0.03   |
| Comorbidities at diagnosis <sup>a</sup> |       |             |        |         |             |        |
| No admission ≤2 years of diagnosis      | 1.30  | [1.07–1.59] | 0.009  | 1.29    | [1.11–1.49] | <0.001 |
| 0                                       | REF   | —           | —      | REF     | —           | —      |
| 1–2                                     | 1.63  | [1.33–2.00] | <0.001 | 1.50    | [1.29–1.75] | <0.001 |
| ≥3                                      | 3.34  | [2.60–4.30] | <0.001 | 3.33    | [2.78–4.00] | <0.001 |
| Neighborhood socioeconomic status       |       |             |        |         |             |        |
| Low                                     | 1.33  | [1.17–1.51] | <0.001 | 1.20    | [1.08–1.33] | <0.001 |
| High                                    | REF   | —           | —      | REF     | —           | —      |

(continued)

SUPPLEMENTARY TABLE S3. (CONTINUED)

| <i>Variables</i>                           | <i>Males</i> |             |          | <i>Females</i> |             |          |
|--------------------------------------------|--------------|-------------|----------|----------------|-------------|----------|
|                                            | <i>HR</i>    | <i>CI</i>   | <i>p</i> | <i>HR</i>      | <i>CI</i>   | <i>p</i> |
| Marital status                             |              |             |          |                |             |          |
| Never married                              | 1.33         | [1.10–1.60] | 0.003    | 1.15           | [0.98–1.34] | 0.08     |
| Previously married                         | 1.23         | [1.01–1.50] | 0.04     | 1.24           | [1.11–1.39] | <0.001   |
| Married                                    | REF          | —           | —        | REF            | —           | —        |
| Unknown marital status                     | 1.45         | [0.92–2.28] | 0.11     | 1.31           | [0.94–1.82] | 0.11     |
| Health insurance at diagnosis              |              |             |          |                |             |          |
| No insurance/self-pay                      | 1.13         | [0.66–1.91] | 0.66     | 1.09           | [0.70–1.70] | 0.69     |
| Private                                    | REF          | —           | —        | REF            | —           | —        |
| Medicaid/government                        | 1.47         | [1.13–1.91] | 0.004    | 1.69           | [1.40–2.04] | <0.001   |
| Medicare                                   | 1.16         | [0.97–1.39] | 0.10     | 1.32           | [1.15–1.52] | 0.001    |
| Unknown insurance                          | 0.99         | [0.78–1.26] | 0.94     | 1.11           | [0.91–1.36] | 0.31     |
| Hospital thyroidectomy volume <sup>b</sup> |              |             |          |                |             |          |
| Low                                        | REF          | —           | —        | REF            | —           | —        |
| High                                       | 0.98         | [0.86–1.12] | 0.79     | 0.92           | [0.83–1.03] | 0.14     |
| Unknown                                    | 1.05         | [0.85–1.30] | 0.66     | 1.07           | [0.91–1.26] | 0.39     |

<sup>a</sup>Exlihauser comorbidity index diagnosis or two years prior to diagnosis, cancer was excluded as a comorbidity.

<sup>b</sup>High-volume thyroidectomy hospital defined as the top 10% of hospitals performing thyroidectomies.
